# Supplementary material
Source: PubMed Central journal article supplement (PMC4285147)
Supplement: NIHMS601839-supplement-Supp_Fig_1.pdf [file NIHMS601839-supplement-Supp_Fig_1.pdf]

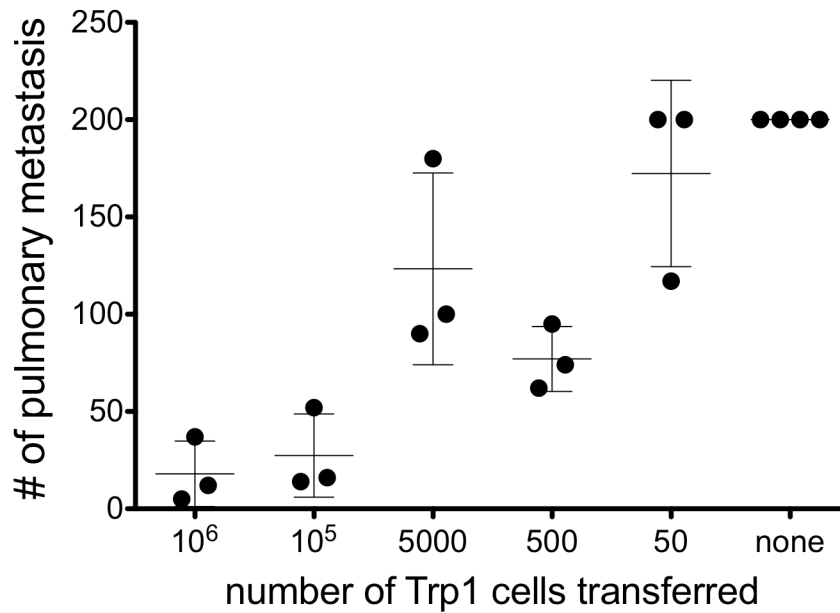

**Supplementary Figure 1: Determining the number of TRP-1 transgenic cells that eliminates 3-day pulmonary metastases.**

Mice with 3-day established D5 pulmonary metastases were treated with  $1 \times 10^6$ ,  $1 \times 10^5$ , 5000, 500, 50 CD4-enriched splenocytes from TRP-1 transgenic mice. Number of pulmonary metastases 22 days after adoptive transfer. Data are from one representative experiment.
