# Supplementary material
Source: PubMed Central journal article supplement (PMC4285147)
Supplement: NIHMS601839-supplement-Supp_Fig_2.pdf [file NIHMS601839-supplement-Supp_Fig_2.pdf]

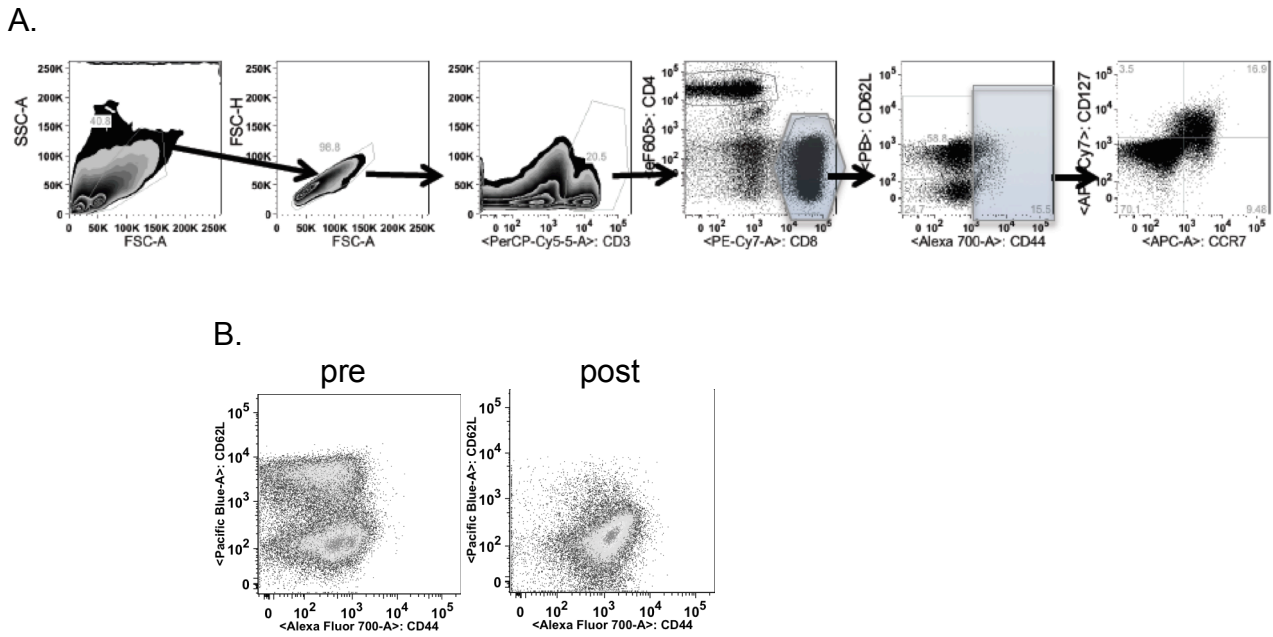

**Supplementary Figure 2: Gating strategy and sort purity for flow cytometry phenotyping.**

A) Gating strategy for splenocyte phenotyping. B) Sort purity for experiments in Figure 3.
