# Supplementary material
Source: PubMed Central journal article supplement (PMC4285147)
Supplement: NIHMS601839-supplement-Supp_Fig_3.pdf [file NIHMS601839-supplement-Supp_Fig_3.pdf]

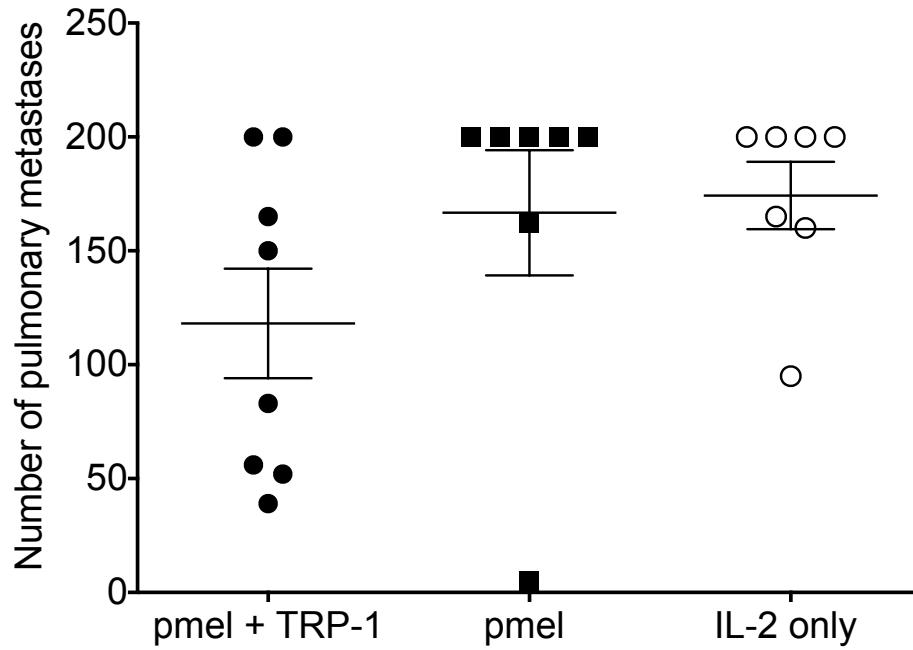

**Supplementary Figure 3. Adoptive immunotherapy in lymphoreplete mice treated with radiation.** Number of pulmonary metastases 20 days after adoptive immunotherapy. Mice with 2-day established pulmonary metastases were treated with 500 cGy irradiation. One day following mice were treated with  $10^6$  pmel and TRP-1,  $10^6$  pmel only or IL-2 only.
